# Supplementary material
Source: ML conference proceedings conference paper supplement (https://openaccess.thecvf.com/content/CVPR_2020/html/Guo_DMCP_Differentiable_Markov_CVPR_2020_paper.html)
Supplement: Supplementary file 1 [file Guo_DMCP_Differentiable_Markov_CVPR_2020_supplemental.pdf]

# DMCP: Differentiable Markov Channel Pruning for Neural Networks

## Supplementary Material

Shaopeng Guo   Yujie Wang   Quanquan Li   Junjie Yan  
SenseTime Research

{guoshaopeng, wangyujie, liquanquan, yanjunjie}@sensetime.com

### A. Structure of the Pruned Model

In this section, we provide the structure of our pruned models in various FLOPs settings. All pruned structures are sampled by the Expected Sampling method. In Table 7, we list the pruned structures of ResNet50 with 2.8G FLOPs. In Table 8, we list the pruned structures of MobileNetV2 with various FLOPs settings.

| block     | 2.8G  |       |       |
|-----------|-------|-------|-------|
|           | conv1 | conv2 | conv3 |
| -         | 51    | -     | -     |
| block 1-1 | 38    | 42    |       |
| block 1-2 | 47    | 47    | 223   |
| block 1-3 | 47    | 47    |       |
| block 2-1 | 103   | 101   |       |
| block 2-2 | 92    | 96    | 461   |
| block 2-3 | 93    | 95    |       |
| block 2-4 | 100   | 100   |       |
| block 3-1 | 218   | 215   |       |
| block 3-2 | 200   | 212   |       |
| block 3-3 | 208   | 213   | 945   |
| block 3-4 | 209   | 213   |       |
| block 3-5 | 213   | 215   |       |
| block 3-6 | 212   | 215   |       |
| block 4-1 | 459   | 454   |       |
| block 4-2 | 455   | 455   | 1735  |
| block 4-3 | 457   | 437   |       |

Table 7. The number of channels in each layer of the pruned ResNet50, the “block” column indicates the index of residual blocks. In each block, we only list the output channel of each layer. The first block marked by “-” is conv1 layer, whose input channel is 3. The fully connected layer is omitted because its output channel is fixed to 1000 for ImageNet classification.

### B. Visualization

#### B.1. FLOPs Distribution of the Pruned Model

We sample 3000 structures from the trained MobileNetV2-210M via the Markov process, and the

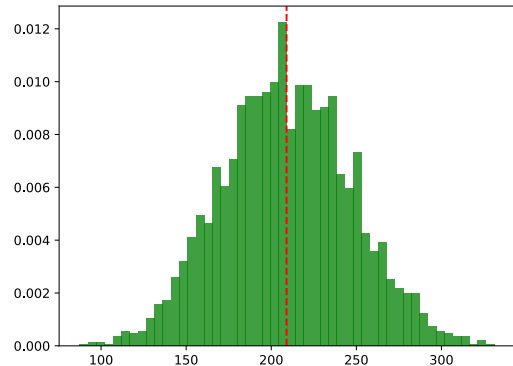

Figure 6. The FLOPs distribution of 3000 structures sampled from MobileNetV2-210M by Markov process. The x-axis is the MFLOPs and the y-axis is the frequency. The red dashed line is the mean of the FLOPs of 3000 sampled structures. The FLOPs of the unpruned network is 672M.

distribution of their FLOPs is showed in Figure 6. From the figure, we can find that the mean of FLOPs lies around 210M, which means that the expected FLOPs converged to the desired budget 210M.

#### B.2. The Channel Distribution of Pruned Layers.

In this section, we examine the channel distribution in each layer of the pruned model. We sample 3000 models from MobileNetV2-210M whose FLOPs are within the desired budget (210M) by Markov process. Figure 7 shows the channel distribution of 12 layers sampled from different blocks. From the figure, we can observe that the number of channel in most layers follows an uni-modal distribution, and some layers choose to retain all the channels (e.g. LinearBottleneck6 and 7).

### C. Comparison between using warm-up and using pre-trained model

As described in Section 3.2, the warm-up is performed by only running stage 1 that updating the weights of the unpruned network by our proposed variant sandwich rule,

| block          | operation | 300M  |        | 210M  |        | 97M   |        | 59M   |        |
|----------------|-----------|-------|--------|-------|--------|-------|--------|-------|--------|
|                |           | input | output | input | output | input | output | input | output |
| -              | conv1     | 3     | 15     | 3     | 13     | 3     | 8      | 3     | 6      |
| bottleneck 1-1 | conv2     | 15    | 15     | 13    | 13     | 8     | 8      | 6     | 6      |
|                | conv3     | 15    | 11     | 13    | 11     | 8     | 7      | 6     | 10     |
| bottleneck 2-1 | conv1     | 11    | 51     | 11    | 45     | 7     | 33     | 10    | 18     |
|                | conv3     | 51    | 19     | 45    | 19     | 33    | 10     | 18    | 12     |
| bottleneck 2-2 | conv1     | 19    | 57     | 19    | 63     | 10    | 32     | 12    | 16     |
|                | conv3     | 57    | 19     | 63    | 19     | 32    | 10     | 16    | 12     |
| bottleneck 3-1 | conv1     | 19    | 126    | 19    | 110    | 10    | 60     | 16    | 32     |
|                | conv3     | 126   | 34     | 110   | 30     | 60    | 17     | 32    | 15     |
| bottleneck 3-2 | conv1     | 34    | 105    | 30    | 118    | 17    | 59     | 15    | 41     |
|                | conv3     | 105   | 34     | 118   | 30     | 59    | 17     | 41    | 15     |
| bottleneck 3-3 | conv1     | 34    | 109    | 30    | 113    | 17    | 59     | 15    | 41     |
|                | conv3     | 109   | 34     | 113   | 30     | 59    | 17     | 41    | 15     |
| bottleneck 4-1 | conv1     | 34    | 246    | 30    | 223    | 17    | 154    | 15    | 98     |
|                | conv3     | 246   | 79     | 223   | 64     | 154   | 46     | 98    | 36     |
| bottleneck 4-2 | conv1     | 79    | 267    | 64    | 241    | 46    | 156    | 36    | 120    |
|                | conv3     | 267   | 79     | 241   | 64     | 156   | 46     | 120   | 36     |
| bottleneck 4-3 | conv1     | 79    | 291    | 64    | 256    | 46    | 194    | 36    | 120    |
|                | conv3     | 291   | 79     | 256   | 64     | 194   | 46     | 120   | 36     |
| bottleneck 4-4 | conv1     | 79    | 284    | 64    | 272    | 46    | 156    | 36    | 120    |
|                | conv3     | 284   | 79     | 272   | 64     | 156   | 46     | 120   | 36     |
| bottleneck 5-1 | conv1     | 79    | 486    | 64    | 415    | 46    | 270    | 36    | 158    |
|                | conv3     | 486   | 102    | 415   | 80     | 270   | 60     | 158   | 45     |
| bottleneck 5-2 | conv1     | 102   | 384    | 80    | 337    | 60    | 177    | 45    | 123    |
|                | conv3     | 384   | 102    | 337   | 80     | 177   | 60     | 123   | 45     |
| bottleneck 5-3 | conv1     | 102   | 422    | 80    | 361    | 60    | 576    | 45    | 123    |
|                | conv3     | 422   | 102    | 361   | 80     | 576   | 60     | 123   | 45     |
| bottleneck 6-1 | conv1     | 102   | 775    | 80    | 694    | 60    | 462    | 45    | 351    |
|                | conv3     | 775   | 231    | 694   | 191    | 462   | 144    | 351   | 96     |
| bottleneck 6-2 | conv1     | 231   | 980    | 191   | 858    | 144   | 576    | 96    | 480    |
|                | conv3     | 980   | 231    | 858   | 191    | 576   | 144    | 480   | 96     |
| bottleneck 6-3 | conv1     | 231   | 1082   | 191   | 933    | 144   | 672    | 96    | 576    |
|                | conv3     | 1082  | 231    | 933   | 191    | 672   | 144    | 576   | 96     |
| bottleneck 7-1 | conv1     | 231   | 1411   | 191   | 1283   | 144   | 864    | 96    | 768    |
|                | conv3     | 1411  | 417    | 1283  | 262    | 864   | 192    | 768   | 128    |

Table 8. The number of channels in pruned MobileNetV2 in various FLOPs settings. The “block” column shows different linear bottlenecks. We only list the number of output channels of conv1 and conv3 in each block because conv2 is depth-wise convolution and its number of channels is equal to the output channels of conv1.

which makes the channel group more important than the channel group right after it, providing a good initialization for iterative training. However, using a pre-trained model cannot provide initialization with the property. Our experiment also shows the superiority of using warm-up, on DMCP-MBV2 with 210M FLOPs by replacing warm-up with using pre-trained models, a 0.6% accuracy drop was observed.

#### D. Modeling architecture parameters as independent Bernoulli variables

Given a layer with  $C$  channels, the solution space of our method is  $O(C)$ , by modeling architecture parameters as Bernoulli variables, the solution space becomes  $O(2^C)$ , as there are  $2^C$  possible channel combinations, which makes it much harder to optimize. To demonstrate our analysis, we experiment on MobileNet-v2 with 210M FLOPs, by replacing Markov modeling with Bernoulli Modelling of architecture parameters, the performance of the pruned model is 70.1%, which is 2.3% lower than DMCP.

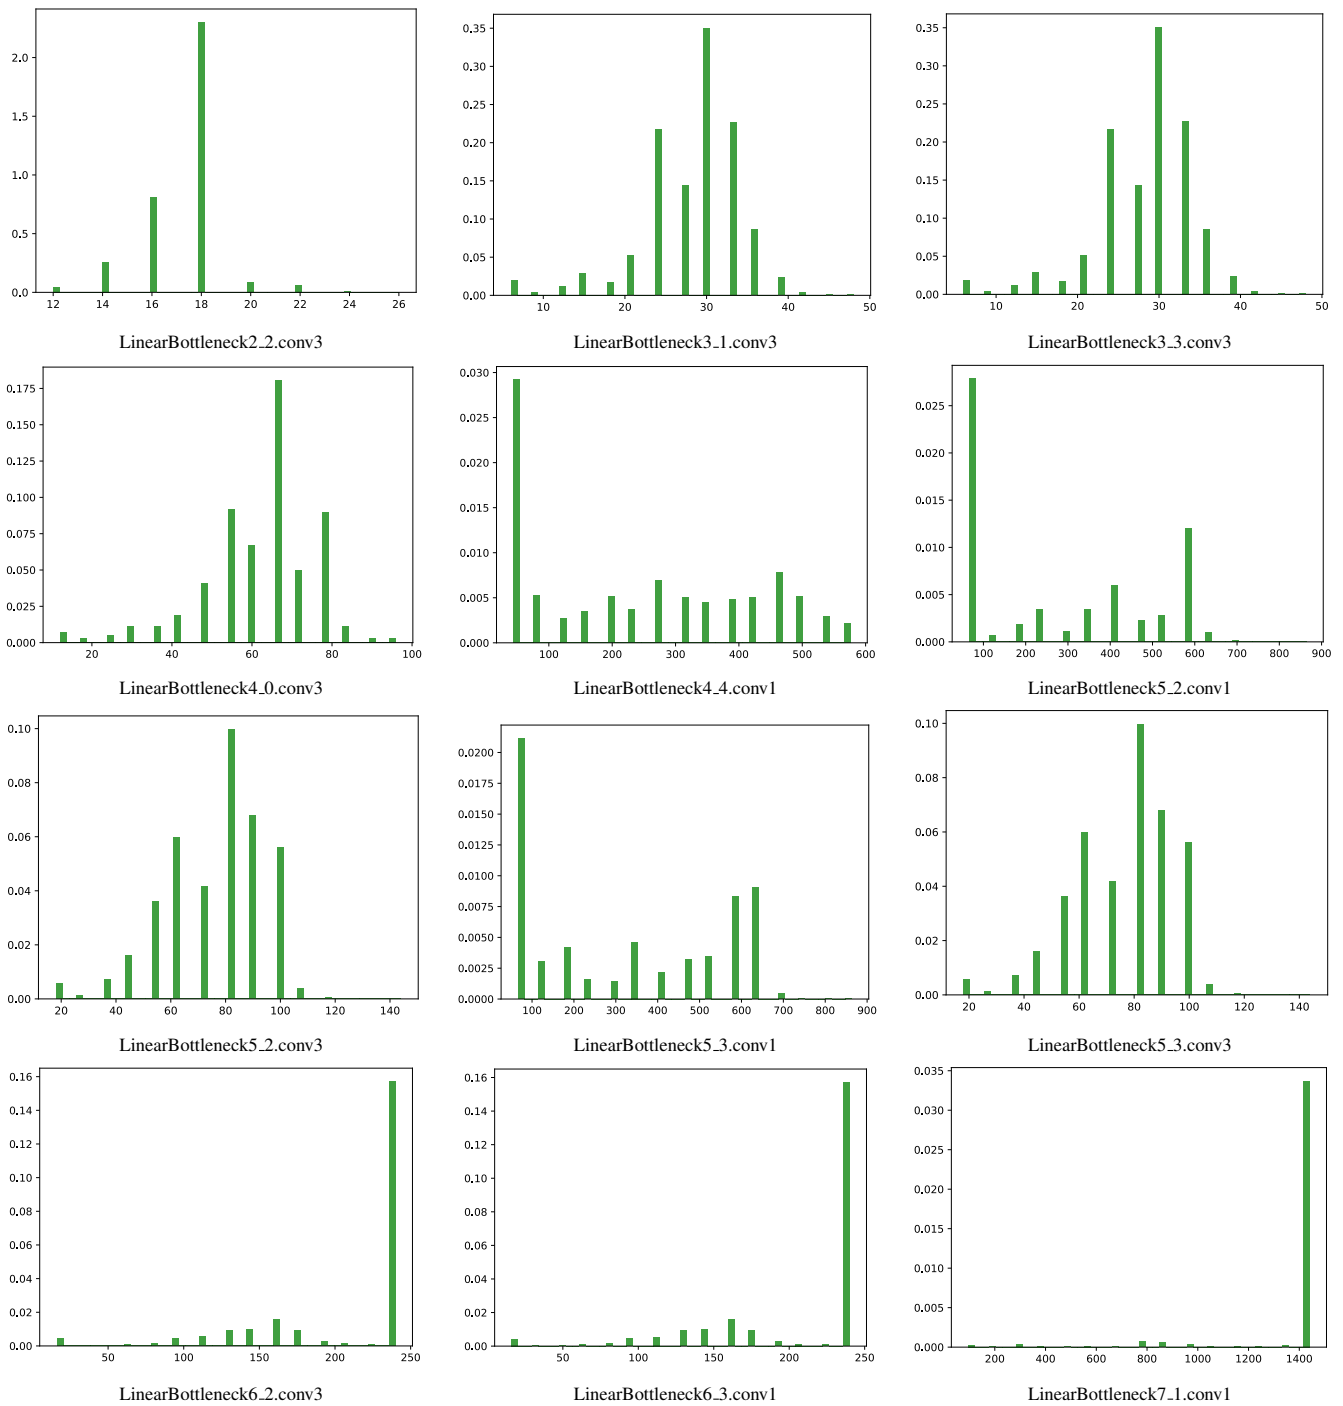

Figure 7. The channel distribution of 12 layers sampled from different blocks in MobileNetV2-210M. The y-axis is the frequency and the x-axis is the number of channels. Note that we divided channels each layer into 15 groups.
